# Supplementary material for: A double SIMEX approach for bivariate random-effects meta-analysis of diagnostic accuracy studies
Source: PubMed Central journal article supplement (PMC5225626; doi:10.1186/s12874-016-0284-2), 2017-01-11
Supplement: 12874_2016_284_MOESM1_ESM.pdf [file 12874_2016_284_MOESM1_ESM.pdf]

**Additional file 1**

for

”A double SIMEX approach for bivariate random-effects meta-analysis of diagnostic accuracy studies”

by Annamaria Guolo

This file reports a portion of the results of the simulation study carried out to evaluate the performance of SIMEX and likelihood-based approaches. Results refer to the medium scenario and to the low and high accuracy scenarios for sample size  $n = 25$ .

Table 1: Simulation results for the medium accuracy scenario. Bias and average of the estimated standard errors (s.e.) for the estimators of  $\bar{\eta}$ ,  $\bar{\xi}$ ,  $\sigma_{\eta}^2$ ,  $\sigma_{\xi}^2$ ,  $\rho$ , on the basis of 1, 000 replicates with  $n = 10$ . Failure rates larger than 5% in bold.

| Random-effects distribution    | $\rho$                 | $\bar{\eta}$<br>bias (s.e.) | $\bar{\xi}$<br>bias (s.e.) | $\sigma_{\eta}^2$<br>bias (s.e.) | $\sigma_{\xi}^2$<br>bias (s.e.) | $\rho$<br>bias (s.e.) | failure rate % |  |
|--------------------------------|------------------------|-----------------------------|----------------------------|----------------------------------|---------------------------------|-----------------------|----------------|--|
| <b>Normal-Normal</b>           |                        |                             |                            |                                  |                                 |                       |                |  |
| Normal                         | 0.2                    | -0.05 (0.32)                | 0.04 (0.21)                | -0.20 (0.51)                     | -0.10 (0.22)                    | -0.02 (0.26)          | 0.5            |  |
|                                | 0.6                    | -0.02 (0.32)                | 0.02 (0.21)                | -0.22 (0.50)                     | -0.10 (0.22)                    | -0.10 (0.21)          | 0.1            |  |
|                                | 0.8                    | -0.01 (0.32)                | 0.03 (0.21)                | -0.26 (0.47)                     | -0.11 (0.21)                    | -0.12 (0.15)          | 0.1            |  |
|                                | <b>Binomial-Normal</b> |                             |                            |                                  |                                 |                       |                |  |
|                                | 0.2                    | -0.01 (0.34)                | 0.00 (0.22)                | -0.06 (0.57)                     | -0.05 (0.24)                    | 0.01 (0.31)           | 2.2            |  |
|                                | 0.6                    | 0.00 (0.34)                 | 0.00 (0.22)                | -0.08 (0.56)                     | -0.05 (0.24)                    | -0.01 (0.23)          | 1.5            |  |
|                                | 0.8                    | 0.01 (0.33)                 | 0.01 (0.22)                | -0.11 (0.55)                     | -0.05 (0.24)                    | -0.02 (0.16)          | <b>6.9</b>     |  |
|                                | <b>SIMEX</b>           |                             |                            |                                  |                                 |                       |                |  |
|                                | 0.2                    | 0.01 (0.34)                 | -0.02 (0.23)               | 0.06 (0.57)                      | 0.05 (0.25)                     | -0.02 (0.28)          | 0.0            |  |
| 0.6                            | 0.03 (0.34)            | -0.03 (0.23)                | 0.05 (0.57)                | 0.04 (0.25)                      | -0.08 (0.22)                    | 0.0                   |                |  |
| 0.8                            | 0.03 (0.34)            | -0.02 (0.23)                | 0.00 (0.54)                | 0.04 (0.25)                      | -0.10 (0.15)                    | 0.0                   |                |  |
| <b>Normal-Normal</b>           |                        |                             |                            |                                  |                                 |                       |                |  |
| <i>t</i>                       | 0.2                    | -0.06 (0.39)                | 0.05 (0.27)                | 0.33 (0.79)                      | 0.18 (0.36)                     | -0.04 (0.25)          | 0.2            |  |
|                                | 0.6                    | -0.06 (0.39)                | 0.03 (0.27)                | 0.34 (0.79)                      | 0.18 (0.36)                     | -0.10 (0.20)          | 0.2            |  |
|                                | 0.8                    | -0.04 (0.39)                | 0.03 (0.27)                | 0.35 (0.78)                      | 0.20 (0.37)                     | -0.10 (0.14)          | 0.1            |  |
|                                | <b>Binomial-Normal</b> |                             |                            |                                  |                                 |                       |                |  |
|                                | 0.2                    | 0.00 (0.43)                 | 0.01 (0.28)                | 0.71 (0.99)                      | 0.31 (0.42)                     | -0.02 (0.29)          | 1.3            |  |
|                                | 0.6                    | -0.01 (0.43)                | 0.00 (0.29)                | 0.76 (1.01)                      | 0.33 (0.44)                     | -0.02 (0.22)          | 1.8            |  |
|                                | 0.8                    | 0.00 (0.43)                 | 0.00 (0.29)                | 0.73 (0.98)                      | 0.35 (0.44)                     | -0.01 (0.14)          | 4.7            |  |
|                                | <b>SIMEX</b>           |                             |                            |                                  |                                 |                       |                |  |
|                                | 0.2                    | 0.03 (0.43)                 | -0.02 (0.29)               | 0.82 (0.92)                      | 0.45 (0.43)                     | -0.04 (0.27)          | 0.0            |  |
| 0.6                            | 0.00 (0.43)            | -0.04 (0.30)                | 0.84 (0.93)                | 0.46 (0.44)                      | -0.08 (0.20)                    | 0.0                   |                |  |
| 0.8                            | 0.01 (0.43)            | -0.03 (0.30)                | 0.81 (0.91)                | 0.47 (0.44)                      | -0.08 (0.14)                    | 0.0                   |                |  |
| <b>Normal-Normal</b>           |                        |                             |                            |                                  |                                 |                       |                |  |
| Skew-normal<br>(low skewness)  | 0.2                    | 0.89 (0.29)                 | -0.55 (0.22)               | -0.52 (0.39)                     | -0.14 (0.22)                    | 0.05 (0.26)           | 1.5            |  |
|                                | 0.6                    | 1.00 (0.31)                 | -0.70 (0.23)               | -0.46 (0.42)                     | -0.12 (0.23)                    | -0.10 (0.21)          | 1.6            |  |
|                                | 0.8                    | 1.05 (0.31)                 | -0.80 (0.22)               | -0.47 (0.41)                     | -0.15 (0.22)                    | -0.18 (0.18)          | 1.9            |  |
|                                | <b>Binomial-Normal</b> |                             |                            |                                  |                                 |                       |                |  |
|                                | 0.2                    | 0.99 (0.31)                 | -0.61 (0.23)               | -0.33 (0.49)                     | -0.06 (0.26)                    | 0.13 (0.33)           | <b>5.4</b>     |  |
|                                | 0.6                    | 1.08 (0.33)                 | -0.75 (0.24)               | -0.24 (0.54)                     | -0.02 (0.29)                    | 0.03 (0.26)           | <b>9.6</b>     |  |
|                                | 0.8                    | 1.14 (0.34)                 | -0.84 (0.24)               | -0.24 (0.60)                     | -0.04 (0.31)                    | -0.02 (0.20)          | <b>21.2</b>    |  |
|                                | <b>SIMEX</b>           |                             |                            |                                  |                                 |                       |                |  |
|                                | 0.2                    | 1.05 (0.32)                 | -0.65 (0.24)               | -0.14 (0.49)                     | 0.09 (0.27)                     | 0.06 (0.27)           | 0.0            |  |
| 0.6                            | 1.14 (0.33)            | -0.81 (0.25)                | -0.08 (0.52)               | 0.15 (0.30)                      | -0.09 (0.22)                    | 0.0                   |                |  |
| 0.8                            | 1.20 (0.33)            | -0.90 (0.24)                | -0.07 (0.52)               | 0.11 (0.29)                      | -0.17 (0.18)                    | 0.0                   |                |  |
| <b>Normal-Normal</b>           |                        |                             |                            |                                  |                                 |                       |                |  |
| Skew-normal<br>(high skewness) | 0.2                    | 0.95 (0.29)                 | -0.34 (0.20)               | -0.52 (0.39)                     | -0.19 (0.18)                    | 0.21 (0.23)           | 1.2            |  |
|                                | 0.6                    | 1.10 (0.31)                 | -0.48 (0.21)               | -0.44 (0.44)                     | -0.15 (0.20)                    | 0.02 (0.18)           | 1.3            |  |
|                                | 0.8                    | 1.23 (0.32)                 | -0.55 (0.22)               | -0.43 (0.44)                     | -0.13 (0.21)                    | -0.11 (0.15)          | 1.2            |  |
|                                | <b>Binomial-Normal</b> |                             |                            |                                  |                                 |                       |                |  |
|                                | 0.2                    | 1.05 (0.32)                 | -0.36 (0.21)               | -0.32 (0.50)                     | -0.13 (0.21)                    | 0.31 (0.29)           | <b>7.8</b>     |  |
|                                | 0.6                    | 1.21 (0.34)                 | -0.50 (0.22)               | -0.15 (0.61)                     | -0.07 (0.25)                    | 0.17 (0.20)           | <b>16.7</b>    |  |
|                                | 0.8                    | 1.35 (0.36)                 | -0.57 (0.23)               | -0.11 (0.63)                     | -0.04 (0.26)                    | 0.05 (0.16)           | <b>22.3</b>    |  |
|                                | <b>SIMEX</b>           |                             |                            |                                  |                                 |                       |                |  |
|                                | 0.2                    | 1.12 (0.32)                 | -0.41 (0.21)               | -0.13 (0.50)                     | -0.02 (0.22)                    | 0.23 (0.24)           | 0.0            |  |
| 0.6                            | 1.27 (0.34)            | -0.55 (0.23)                | -0.01 (0.55)               | 0.04 (0.25)                      | 0.03 (0.18)                     | 0.0                   |                |  |
| 0.8                            | 1.41 (0.35)            | -0.62 (0.24)                | 0.02 (0.57)                | 0.09 (0.27)                      | -0.10 (0.16)                    | 0.0                   |                |  |

Table 2: Simulation results for the medium accuracy scenario. Bias and average of the estimated standard errors (s.e.) for the estimators of  $\bar{\eta}$ ,  $\bar{\xi}$ ,  $\sigma_{\eta}^2$ ,  $\sigma_{\xi}^2$ ,  $\rho$ , on the basis of 1, 000 replicates with  $n = 25$ . Failure rates larger than 5% in bold.

| Random-effects distribution    | $\rho$                 | $\bar{\eta}$<br>bias (s.e.) | $\bar{\xi}$<br>bias (s.e.) | $\sigma_{\eta}^2$<br>bias (s.e.) | $\sigma_{\xi}^2$<br>bias (s.e.) | $\rho$<br>bias (s.e.) | failure rate % |  |
|--------------------------------|------------------------|-----------------------------|----------------------------|----------------------------------|---------------------------------|-----------------------|----------------|--|
| <b>Normal-Normal</b>           |                        |                             |                            |                                  |                                 |                       |                |  |
| Normal                         | 0.2                    | -0.03 (0.21)                | 0.04 (0.14)                | -0.16 (0.34)                     | -0.07 (0.15)                    | -0.03 (0.18)          | 0.7            |  |
|                                | 0.6                    | -0.02 (0.21)                | 0.02 (0.14)                | -0.17 (0.33)                     | -0.06 (0.15)                    | -0.08 (0.14)          | 0.0            |  |
|                                | 0.8                    | -0.02 (0.21)                | 0.02 (0.14)                | -0.18 (0.32)                     | -0.07 (0.14)                    | -0.10 (0.10)          | 0.0            |  |
|                                | <b>Binomial-Normal</b> |                             |                            |                                  |                                 |                       |                |  |
|                                | 0.2                    | 0.00 (0.22)                 | 0.01 (0.15)                | -0.03 (0.37)                     | -0.02 (0.16)                    | 0.00 (0.21)           | 1.0            |  |
|                                | 0.6                    | 0.00 (0.22)                 | 0.00 (0.15)                | -0.03 (0.37)                     | -0.01 (0.16)                    | 0.01 (0.15)           | 0.0            |  |
|                                | 0.8                    | 0.00 (0.22)                 | 0.00 (0.15)                | -0.04 (0.36)                     | -0.01 (0.16)                    | 0.01 (0.09)           | 0.7            |  |
|                                | <b>SIMEX</b>           |                             |                            |                                  |                                 |                       |                |  |
|                                | 0.2                    | 0.04 (0.23)                 | -0.02 (0.15)               | 0.13 (0.38)                      | 0.10 (0.17)                     | -0.03 (0.19)          | 0.0            |  |
| 0.6                            | 0.03 (0.23)            | -0.03 (0.15)                | 0.13 (0.38)                | 0.10 (0.17)                      | -0.06 (0.14)                    | 0.0                   |                |  |
| 0.8                            | 0.03 (0.23)            | -0.03 (0.15)                | 0.13 (0.38)                | 0.11 (0.17)                      | -0.09 (0.10)                    | 0.0                   |                |  |
| <b>Normal-Normal</b>           |                        |                             |                            |                                  |                                 |                       |                |  |
| <i>t</i>                       | 0.2                    | -0.08 (0.26)                | 0.04 (0.18)                | 0.38 (0.52)                      | 0.23 (0.24)                     | -0.02 (0.17)          | 0.5            |  |
|                                | 0.6                    | -0.05 (0.26)                | 0.03 (0.18)                | 0.39 (0.52)                      | 0.22 (0.24)                     | -0.09 (0.13)          | 0.0            |  |
|                                | 0.8                    | -0.04 (0.26)                | 0.03 (0.18)                | 0.39 (0.51)                      | 0.20 (0.23)                     | -0.10 (0.10)          | 0.0            |  |
|                                | <b>Binomial-Normal</b> |                             |                            |                                  |                                 |                       |                |  |
|                                | 0.2                    | -0.02 (0.28)                | 0.00 (0.19)                | 0.76 (0.63)                      | 0.36 (0.28)                     | 0.02 (0.20)           | 0.7            |  |
|                                | 0.6                    | -0.01 (0.29)                | -0.01 (0.19)               | 0.83 (0.66)                      | 0.37 (0.28)                     | 0.00 (0.14)           | 0.0            |  |
|                                | 0.8                    | -0.01 (0.29)                | 0.00 (0.19)                | 0.82 (0.65)                      | 0.35 (0.28)                     | 0.00 (0.09)           | 0.0            |  |
|                                | <b>SIMEX</b>           |                             |                            |                                  |                                 |                       |                |  |
|                                | 0.2                    | 0.00 (0.29)                 | -0.03 (0.20)               | 0.99 (0.63)                      | 0.54 (0.30)                     | 0.00 (0.18)           | 0.0            |  |
| 0.6                            | 0.02 (0.29)            | -0.04 (0.20)                | 1.04 (0.64)                | 0.55 (0.30)                      | -0.06 (0.13)                    | 0.0                   |                |  |
| 0.8                            | 0.02 (0.29)            | -0.03 (0.20)                | 0.99 (0.63)                | 0.52 (0.29)                      | -0.07 (0.09)                    | 0.0                   |                |  |
| <b>Normal-Normal</b>           |                        |                             |                            |                                  |                                 |                       |                |  |
| Skew-normal<br>(low skewness)  | 0.2                    | 0.91 (0.19)                 | -0.52 (0.14)               | -0.50 (0.25)                     | -0.10 (0.15)                    | 0.05 (0.17)           | 0.6            |  |
|                                | 0.6                    | 1.00 (0.20)                 | -0.69 (0.15)               | -0.46 (0.27)                     | -0.10 (0.15)                    | -0.11 (0.14)          | 0.1            |  |
|                                | 0.8                    | 1.04 (0.20)                 | -0.80 (0.15)               | -0.43 (0.27)                     | -0.13 (0.14)                    | -0.17 (0.12)          | 0.0            |  |
|                                | <b>Binomial-Normal</b> |                             |                            |                                  |                                 |                       |                |  |
|                                | 0.2                    | 1.00 (0.20)                 | -0.57 (0.15)               | -0.33 (0.31)                     | -0.03 (0.17)                    | 0.13 (0.21)           | 1.0            |  |
|                                | 0.6                    | 1.09 (0.21)                 | -0.74 (0.16)               | -0.26 (0.33)                     | -0.02 (0.18)                    | 0.04 (0.16)           | 0.5            |  |
|                                | 0.8                    | 1.11 (0.21)                 | -0.84 (0.15)               | -0.23 (0.34)                     | -0.05 (0.17)                    | 0.01 (0.12)           | 4.9            |  |
|                                | <b>SIMEX</b>           |                             |                            |                                  |                                 |                       |                |  |
|                                | 0.2                    | 1.07 (0.21)                 | -0.62 (0.16)               | -0.11 (0.31)                     | 0.14 (0.19)                     | 0.06 (0.18)           | 0.0            |  |
| 0.6                            | 1.15 (0.22)            | -0.80 (0.16)                | -0.02 (0.34)               | 0.19 (0.20)                      | -0.09 (0.15)                    | 0.0                   |                |  |
| 0.8                            | 1.18 (0.22)            | -0.91 (0.16)                | 0.01 (0.35)                | 0.16 (0.19)                      | -0.17 (0.12)                    | 0.0                   |                |  |
| <b>Normal-Normal</b>           |                        |                             |                            |                                  |                                 |                       |                |  |
| Skew-normal<br>(high skewness) | 0.2                    | 0.95 (0.19)                 | -0.34 (0.13)               | -0.48 (0.26)                     | -0.17 (0.12)                    | 0.21 (0.16)           | 0.1            |  |
|                                | 0.6                    | 1.12 (0.21)                 | -0.45 (0.14)               | -0.37 (0.30)                     | -0.12 (0.14)                    | 0.02 (0.12)           | 0.0            |  |
|                                | 0.8                    | 1.23 (0.21)                 | -0.54 (0.15)               | -0.35 (0.30)                     | -0.09 (0.15)                    | -0.10 (0.10)          | 0.0            |  |
|                                | <b>Binomial-Normal</b> |                             |                            |                                  |                                 |                       |                |  |
|                                | 0.2                    | 1.05 (0.21)                 | -0.37 (0.14)               | -0.28 (0.32)                     | -0.12 (0.14)                    | 0.32 (0.19)           | 0.6            |  |
|                                | 0.6                    | 1.23 (0.23)                 | -0.47 (0.15)               | -0.12 (0.38)                     | -0.06 (0.16)                    | 0.18 (0.12)           | 2.0            |  |
|                                | 0.8                    | 1.35 (0.23)                 | -0.56 (0.15)               | -0.08 (0.40)                     | -0.03 (0.17)                    | 0.07 (0.09)           | <b>7.5</b>     |  |
|                                | <b>SIMEX</b>           |                             |                            |                                  |                                 |                       |                |  |
|                                | 0.2                    | 1.11 (0.21)                 | -0.41 (0.14)               | -0.05 (0.33)                     | 0.02 (0.15)                     | 0.23 (0.16)           | 0.0            |  |
| 0.6                            | 1.30 (0.23)            | -0.51 (0.15)                | 0.12 (0.38)                | 0.10 (0.17)                      | 0.03 (0.12)                     | 0.0                   |                |  |
| 0.8                            | 1.41 (0.23)            | -0.61 (0.16)                | 0.14 (0.39)                | 0.14 (0.18)                      | -0.10 (0.10)                    | 0.0                   |                |  |

Table 3: Simulation results for the high accuracy scenario. Bias and average of the estimated standard errors (s.e.) for the estimators of  $\bar{\eta}$ ,  $\bar{\xi}$ ,  $\sigma_{\eta}^2$ ,  $\sigma_{\xi}^2$ ,  $\rho$ , on the basis of 1, 000 replicates with  $n = 25$ . Failure rates larger than 5% in bold.

| Random-effects distribution    | $\rho$                 | $\bar{\eta}$<br>bias (s.e.) | $\bar{\xi}$<br>bias (s.e.) | $\sigma_{\eta}^2$<br>bias (s.e.) | $\sigma_{\xi}^2$<br>bias (s.e.) | $\rho$<br>bias (s.e.) | failure rate % |  |
|--------------------------------|------------------------|-----------------------------|----------------------------|----------------------------------|---------------------------------|-----------------------|----------------|--|
| <b>Normal-Normal</b>           |                        |                             |                            |                                  |                                 |                       |                |  |
| Normal                         | 0.2                    | -0.20 (0.22)                | 0.06 (0.15)                | -0.38 (0.31)                     | -0.10 (0.15)                    | -0.05 (0.18)          | 1.0            |  |
|                                | 0.6                    | -0.16 (0.22)                | 0.04 (0.15)                | -0.36 (0.31)                     | -0.09 (0.15)                    | -0.14 (0.15)          | 0.1            |  |
|                                | 0.8                    | -0.14 (0.22)                | 0.02 (0.15)                | -0.35 (0.32)                     | -0.08 (0.15)                    | -0.17 (0.12)          | 0.0            |  |
|                                | <b>Binomial-Normal</b> |                             |                            |                                  |                                 |                       |                |  |
|                                | 0.2                    | 0.00 (0.24)                 | 0.00 (0.15)                | -0.04 (0.43)                     | -0.02 (0.18)                    | 0.01 (0.23)           | 0.8            |  |
|                                | 0.6                    | 0.01 (0.24)                 | 0.00 (0.16)                | -0.02 (0.43)                     | -0.01 (0.18)                    | 0.01 (0.17)           | 0.6            |  |
|                                | 0.8                    | 0.01 (0.24)                 | 0.00 (0.16)                | -0.02 (0.43)                     | -0.01 (0.18)                    | 0.01 (0.12)           | 3.0            |  |
|                                | <b>SIMEX</b>           |                             |                            |                                  |                                 |                       |                |  |
|                                | 0.2                    | 0.06 (0.23)                 | -0.06 (0.16)               | 0.18 (0.40)                      | 0.18 (0.20)                     | -0.04 (0.19)          | 0.0            |  |
| 0.6                            | 0.07 (0.23)            | -0.06 (0.16)                | 0.19 (0.40)                | 0.19 (0.20)                      | -0.12 (0.15)                    | 0.0                   |                |  |
| 0.8                            | 0.07 (0.23)            | -0.06 (0.16)                | 0.18 (0.40)                | 0.19 (0.20)                      | -0.16 (0.12)                    | 0.0                   |                |  |
| <b>Normal-Normal</b>           |                        |                             |                            |                                  |                                 |                       |                |  |
| <i>t</i>                       | 0.2                    | -0.25 (0.27)                | 0.09 (0.19)                | 0.23 (0.50)                      | 0.22 (0.25)                     | -0.06 (0.18)          | 0.9            |  |
|                                | 0.6                    | -0.19 (0.27)                | 0.06 (0.18)                | 0.21 (0.49)                      | 0.19 (0.24)                     | -0.14 (0.15)          | 0.0            |  |
|                                | 0.8                    | -0.17 (0.27)                | 0.04 (0.19)                | 0.25 (0.51)                      | 0.24 (0.26)                     | -0.16 (0.12)          | 0.0            |  |
|                                | <b>Binomial-Normal</b> |                             |                            |                                  |                                 |                       |                |  |
|                                | 0.2                    | -0.02 (0.30)                | 0.00 (0.20)                | 0.84 (0.73)                      | 0.39 (0.31)                     | -0.01 (0.21)          | 1.5            |  |
|                                | 0.6                    | 0.00 (0.31)                 | 0.01 (0.20)                | 0.85 (0.73)                      | 0.36 (0.30)                     | 0.00 (0.16)           | 0.3            |  |
|                                | 0.8                    | 0.01 (0.31)                 | 0.00 (0.20)                | 0.88 (0.74)                      | 0.39 (0.31)                     | 0.00 (0.11)           | 1.2            |  |
|                                | <b>SIMEX</b>           |                             |                            |                                  |                                 |                       |                |  |
|                                | 0.2                    | -0.01 (0.28)                | -0.05 (0.21)               | 0.86 (0.59)                      | 0.61 (0.32)                     | -0.05 (0.19)          | 0.0            |  |
| 0.6                            | 0.01 (0.28)            | -0.04 (0.20)                | 0.85 (0.59)                | 0.58 (0.31)                      | -0.11 (0.15)                    | 0.0                   |                |  |
| 0.8                            | 0.01 (0.28)            | -0.05 (0.21)                | 0.82 (0.58)                | 0.59 (0.31)                      | -0.13 (0.11)                    | 0.0                   |                |  |
| <b>Normal-Normal</b>           |                        |                             |                            |                                  |                                 |                       |                |  |
| Skew-normal<br>(low skewness)  | 0.2                    | -0.63 (0.19)                | 0.17 (0.14)                | -0.50 (0.25)                     | -0.11 (0.15)                    | 0.05 (0.17)           | 0.5            |  |
|                                | 0.6                    | -0.55 (0.20)                | 0.00 (0.15)                | -0.45 (0.27)                     | -0.10 (0.15)                    | -0.11 (0.14)          | 0.1            |  |
|                                | 0.8                    | -0.51 (0.20)                | -0.09 (0.15)               | -0.40 (0.28)                     | -0.12 (0.15)                    | -0.18 (0.12)          | 0.0            |  |
|                                | <b>Binomial-Normal</b> |                             |                            |                                  |                                 |                       |                |  |
|                                | 0.2                    | -0.53 (0.20)                | 0.12 (0.15)                | -0.31 (0.31)                     | -0.04 (0.17)                    | 0.12 (0.22)           | 0.7            |  |
|                                | 0.6                    | -0.47 (0.21)                | -0.05 (0.16)               | -0.25 (0.33)                     | -0.02 (0.18)                    | 0.04 (0.16)           | 1.2            |  |
|                                | 0.8                    | -0.43 (0.22)                | -0.14 (0.16)               | -0.19 (0.36)                     | -0.03 (0.18)                    | 0.00 (0.12)           | 4.5            |  |
|                                | <b>SIMEX</b>           |                             |                            |                                  |                                 |                       |                |  |
|                                | 0.2                    | -0.47 (0.21)                | 0.07 (0.16)                | -0.08 (0.32)                     | 0.15 (0.19)                     | 0.06 (0.18)           | 0.0            |  |
| 0.6                            | -0.40 (0.22)           | -0.11 (0.16)                | -0.01 (0.34)               | 0.19 (0.20)                      | -0.10 (0.15)                    | 0.0                   |                |  |
| 0.8                            | -0.37 (0.22)           | -0.21 (0.16)                | 0.05 (0.36)                | 0.18 (0.20)                      | -0.17 (0.12)                    | 0.0                   |                |  |
| <b>Normal-Normal</b>           |                        |                             |                            |                                  |                                 |                       |                |  |
| Skew-normal<br>(high skewness) | 0.2                    | -0.62 (0.19)                | 0.35 (0.13)                | -0.46 (0.26)                     | -0.17 (0.12)                    | 0.21 (0.15)           | 0.0            |  |
|                                | 0.6                    | -0.45 (0.21)                | 0.24 (0.14)                | -0.39 (0.29)                     | -0.12 (0.14)                    | 0.01 (0.12)           | 0.0            |  |
|                                | 0.8                    | -0.33 (0.22)                | 0.15 (0.15)                | -0.33 (0.31)                     | -0.09 (0.15)                    | -0.10 (0.10)          | 0.0            |  |
|                                | <b>Binomial-Normal</b> |                             |                            |                                  |                                 |                       |                |  |
|                                | 0.2                    | -0.52 (0.21)                | 0.32 (0.14)                | -0.27 (0.33)                     | -0.12 (0.14)                    | 0.32 (0.18)           | 0.3            |  |
|                                | 0.6                    | -0.34 (0.22)                | 0.22 (0.15)                | -0.14 (0.37)                     | -0.06 (0.16)                    | 0.16 (0.13)           | 2.3            |  |
|                                | 0.8                    | -0.22 (0.24)                | 0.13 (0.15)                | -0.05 (0.42)                     | -0.02 (0.18)                    | 0.07 (0.09)           | <b>7.6</b>     |  |
|                                | <b>SIMEX</b>           |                             |                            |                                  |                                 |                       |                |  |
|                                | 0.2                    | -0.46 (0.21)                | 0.28 (0.14)                | -0.03 (0.34)                     | 0.02 (0.15)                     | 0.23 (0.16)           | 0.0            |  |
| 0.6                            | -0.28 (0.23)           | 0.17 (0.15)                 | 0.09 (0.37)                | 0.11 (0.17)                      | 0.02 (0.12)                     | 0.0                   |                |  |
| 0.8                            | -0.15 (0.23)           | 0.08 (0.16)                 | 0.18 (0.40)                | 0.15 (0.19)                      | -0.09 (0.10)                    | 0.0                   |                |  |

Table 4: Simulation results for the low accuracy scenario. Bias and average of the estimated standard errors (s.e.) for the estimators of  $\bar{\eta}$ ,  $\bar{\xi}$ ,  $\sigma_{\eta}^2$ ,  $\sigma_{\xi}^2$ ,  $\rho$ , on the basis of 1, 000 replicates with  $n = 25$ . Failure rates larger than 5% in bold.

| Random-effects distribution    | $\rho$                 | $\bar{\eta}$<br>bias (s.e.) | $\bar{\xi}$<br>bias (s.e.) | $\sigma_{\eta}^2$<br>bias (s.e.) | $\sigma_{\xi}^2$<br>bias (s.e.) | $\rho$<br>bias (s.e.) | failure rate % |  |
|--------------------------------|------------------------|-----------------------------|----------------------------|----------------------------------|---------------------------------|-----------------------|----------------|--|
| <b>Normal-Normal</b>           |                        |                             |                            |                                  |                                 |                       |                |  |
| Normal                         | 0.2                    | -0.01 (0.21)                | 0.01 (0.14)                | -0.10 (0.34)                     | -0.04 (0.15)                    | -0.03 (0.18)          | 0.8            |  |
|                                | 0.6                    | -0.01 (0.21)                | 0.00 (0.14)                | -0.14 (0.32)                     | -0.06 (0.14)                    | -0.06 (0.13)          | 0.0            |  |
|                                | 0.8                    | -0.01 (0.21)                | 0.00 (0.14)                | -0.14 (0.33)                     | -0.05 (0.14)                    | -0.08 (0.09)          | 0.0            |  |
|                                | <b>Binomial-Normal</b> |                             |                            |                                  |                                 |                       |                |  |
|                                | 0.2                    | 0.00 (0.22)                 | -0.01 (0.15)               | -0.03 (0.36)                     | -0.01 (0.16)                    | -0.01 (0.20)          | 1.6            |  |
|                                | 0.6                    | -0.01 (0.22)                | -0.01 (0.14)               | -0.07 (0.35)                     | -0.03 (0.15)                    | 0.00 (0.14)           | 0.0            |  |
|                                | 0.8                    | -0.01 (0.22)                | -0.01 (0.14)               | -0.05 (0.35)                     | -0.02 (0.15)                    | 0.00 (0.09)           | 0.1            |  |
|                                | <b>SIMEX</b>           |                             |                            |                                  |                                 |                       |                |  |
|                                | 0.2                    | 0.01 (0.22)                 | -0.02 (0.15)               | 0.08 (0.36)                      | 0.06 (0.16)                     | -0.03 (0.19)          | 0.0            |  |
| 0.6                            | 0.00 (0.22)            | -0.02 (0.15)                | 0.04 (0.35)                | 0.05 (0.16)                      | -0.05 (0.14)                    | 0.0                   |                |  |
| 0.8                            | 0.00 (0.22)            | -0.02 (0.15)                | 0.06 (0.36)                | 0.06 (0.16)                      | -0.07 (0.09)                    | 0.0                   |                |  |
| <b>Normal-Normal</b>           |                        |                             |                            |                                  |                                 |                       |                |  |
| <i>t</i>                       | 0.2                    | -0.04 (0.26)                | 0.02 (0.18)                | 0.47 (0.53)                      | 0.25 (0.24)                     | -0.03 (0.17)          | 0.5            |  |
|                                | 0.6                    | -0.01 (0.26)                | 0.02 (0.18)                | 0.44 (0.52)                      | 0.25 (0.24)                     | -0.07 (0.13)          | 0.0            |  |
|                                | 0.8                    | -0.01 (0.26)                | 0.02 (0.17)                | 0.39 (0.50)                      | 0.22 (0.23)                     | -0.07 (0.09)          | 0.0            |  |
|                                | <b>Binomial-Normal</b> |                             |                            |                                  |                                 |                       |                |  |
|                                | 0.2                    | -0.02 (0.28)                | 0.00 (0.19)                | 0.80 (0.63)                      | 0.36 (0.27)                     | 0.00 (0.19)           | 1.0            |  |
|                                | 0.6                    | 0.00 (0.28)                 | 0.01 (0.19)                | 0.80 (0.63)                      | 0.37 (0.28)                     | -0.01 (0.14)          | 0.2            |  |
|                                | 0.8                    | -0.01 (0.28)                | 0.00 (0.19)                | 0.79 (0.63)                      | 0.36 (0.27)                     | 0.00 (0.08)           | 0.3            |  |
|                                | <b>SIMEX</b>           |                             |                            |                                  |                                 |                       |                |  |
|                                | 0.2                    | -0.01 (0.29)                | -0.01 (0.20)               | 1.02 (0.63)                      | 0.52 (0.29)                     | -0.01 (0.18)          | 0.0            |  |
| 0.6                            | 0.01 (0.29)            | -0.01 (0.20)                | 1.01 (0.63)                | 0.52 (0.29)                      | -0.05 (0.13)                    | 0.0                   |                |  |
| 0.8                            | 0.00 (0.29)            | -0.02 (0.20)                | 0.99 (0.62)                | 0.51 (0.29)                      | -0.05 (0.09)                    | 0.0                   |                |  |
| <b>Normal-Normal</b>           |                        |                             |                            |                                  |                                 |                       |                |  |
| Skew-normal<br>(low skewness)  | 0.2                    | -0.55 (0.19)                | 0.13 (0.14)                | -0.37 (0.26)                     | -0.06 (0.14)                    | 0.10 (0.17)           | 1.1            |  |
|                                | 0.6                    | -0.47 (0.19)                | -0.03 (0.14)               | -0.31 (0.27)                     | -0.05 (0.14)                    | -0.03 (0.13)          | 1.2            |  |
|                                | 0.8                    | -0.43 (0.19)                | -0.12 (0.14)               | -0.29 (0.28)                     | -0.08 (0.14)                    | -0.08 (0.09)          | 0.5            |  |
|                                | <b>Binomial-Normal</b> |                             |                            |                                  |                                 |                       |                |  |
|                                | 0.2                    | -0.56 (0.19)                | 0.12 (0.14)                | -0.33 (0.27)                     | -0.04 (0.15)                    | 0.13 (0.19)           | 2.2            |  |
|                                | 0.6                    | -0.48 (0.20)                | -0.04 (0.14)               | -0.26 (0.29)                     | -0.02 (0.15)                    | 0.03 (0.14)           | 1.5            |  |
|                                | 0.8                    | -0.44 (0.20)                | -0.14 (0.14)               | -0.23 (0.30)                     | -0.04 (0.15)                    | 0.00 (0.09)           | 0.5            |  |
|                                | <b>SIMEX</b>           |                             |                            |                                  |                                 |                       |                |  |
|                                | 0.2                    | -0.56 (0.19)                | 0.11 (0.14)                | -0.25 (0.27)                     | 0.03 (0.15)                     | 0.10 (0.18)           | 0.0            |  |
| 0.6                            | -0.48 (0.20)           | -0.06 (0.15)                | -0.19 (0.29)               | 0.05 (0.16)                      | -0.02 (0.13)                    | 0.0                   |                |  |
| 0.8                            | -0.44 (0.20)           | -0.16 (0.14)                | -0.14 (0.30)               | 0.04 (0.15)                      | -0.07 (0.09)                    | 0.0                   |                |  |
| <b>Normal-Normal</b>           |                        |                             |                            |                                  |                                 |                       |                |  |
| Skew-normal<br>(high skewness) | 0.2                    | -0.51 (0.19)                | 0.34 (0.13)                | -0.34 (0.26)                     | -0.15 (0.11)                    | 0.28 (0.15)           | 1.0            |  |
|                                | 0.6                    | -0.34 (0.20)                | 0.23 (0.13)                | -0.21 (0.30)                     | -0.09 (0.13)                    | 0.10 (0.10)           | 0.2            |  |
|                                | 0.8                    | -0.21 (0.21)                | 0.15 (0.14)                | -0.17 (0.31)                     | -0.07 (0.14)                    | 0.00 (0.07)           | 0.1            |  |
|                                | <b>Binomial-Normal</b> |                             |                            |                                  |                                 |                       |                |  |
|                                | 0.2                    | -0.51 (0.20)                | 0.33 (0.13)                | -0.29 (0.28)                     | -0.13 (0.12)                    | 0.33 (0.16)           | 1.4            |  |
|                                | 0.6                    | -0.35 (0.21)                | 0.22 (0.14)                | -0.14 (0.32)                     | -0.07 (0.14)                    | 0.18 (0.10)           | 0.6            |  |
|                                | 0.8                    | -0.21 (0.22)                | 0.14 (0.14)                | -0.08 (0.34)                     | -0.03 (0.15)                    | 0.07 (0.06)           | 0.9            |  |
|                                | <b>SIMEX</b>           |                             |                            |                                  |                                 |                       |                |  |
|                                | 0.2                    | -0.51 (0.20)                | 0.33 (0.13)                | -0.21 (0.28)                     | -0.08 (0.12)                    | 0.29 (0.15)           | 0.0            |  |
| 0.6                            | -0.34 (0.21)           | 0.21 (0.14)                 | -0.06 (0.32)               | 0.00 (0.14)                      | 0.11 (0.10)                     | 0.0                   |                |  |
| 0.8                            | -0.21 (0.22)           | 0.13 (0.14)                 | 0.02 (0.35)                | 0.04 (0.15)                      | 0.01 (0.07)                     | 0.0                   |                |  |
