# Supplementary material for: A double SIMEX approach for bivariate random-effects meta-analysis of diagnostic accuracy studies
Source: PubMed Central journal article supplement (PMC5225626; doi:10.1186/s12874-016-0284-2), 2017-01-11
Supplement: 12874_2016_284_MOESM3_ESM.pdf [file 12874_2016_284_MOESM3_ESM.pdf]

### Additional file 3

for

”A double SIMEX approach for bivariate random-effects meta-analysis of diagnostic accuracy studies”  
by Annamaria Guolo

This file shows how to obtain SIMEX estimates and standard errors for the parameters of the bivariate random-effects model using the software written in the R programming language and available in the Additional file 2. The illustration is based on the transesophageal echocardiography data [1] reported in Table 3 of the paper. Functions needed to implement SIMEX can be loaded as follows

```
R> source("Diagnostic_test_SIMEX.R")
```

Data for the analysis:

```
R> TP <- c( 3, 3, 4, 0, 4, 5 ) ## true positives  
R> FN <- c( 25, 19, 10, 6, 10, 11 ) ## false negatives  
R> TN <- c( 72, 66, 56, 8, 66, 49 ) ## true negatives  
R> FP <- c( 0, 0, 0, 0, 1, 1 ) ## false positives
```

SIMEX results are provided by applying function `simex.results`, with arguments

- TP: number of true positives
- FN: number of false negatives
- TN: number of true negatives
- FP: number of false positives
- `lambda`: the vector  $\Lambda$  of values for which the simulation step should be done. Default  $\Lambda = \{0.0; 0.5; 1.0; 1.5; 2.0\}$
- B: number of iterations for each  $\lambda$ . Default B=100

- `lambda.first.avoid`: logical, used to include or exclude the first value of  $\Lambda$ ,  $\lambda = 0$ . Default value `FALSE`
- `extr.function`: extrapolation function, to be chosen between `linear` and `quadratic`. Default value `quadratic`

```
## set the seed to guarantee the reproducibility of the results
R> set.seed(0207)
simex.ris.all <- simex.results( TP = TP, FN = FN, TN = TN, FP = FP )
```

The output reports the estimate and the standard error for the component of  $\theta$ , the associated variance/covariance matrix, the chosen values of  $\lambda$  and the chosen extrapolation function

```
R> simex.ris.all
```

Simex estimate:

|          | mu.eta  | mu.xi   | var.eta | var.xi | rho     |
|----------|---------|---------|---------|--------|---------|
| Estimate | -1.5250 | -4.2663 | 0.3990  | 0.3665 | -0.3739 |
| Std.Err. | 0.2920  | 0.3255  | 0.3002  | 0.3722 | 0.5958  |

Simex estimated variance/covariance matrix:

|         | mu.eta    | mu.xi     | var.eta   | var.xi    | rho       |
|---------|-----------|-----------|-----------|-----------|-----------|
| mu.eta  | 0.085291  | -0.021686 | 0.000000  | 0.000000  | 0.000000  |
| mu.xi   | -0.021686 | 0.105930  | 0.001014  | 0.000000  | 0.000000  |
| var.eta | 0.000000  | 0.001014  | 0.090125  | -0.012183 | 0.000000  |
| var.xi  | 0.000000  | 0.000000  | -0.012183 | 0.138554  | -0.028347 |
| rho     | 0.000000  | 0.000000  | 0.000000  | -0.028347 | 0.354997  |

Values of lambda:

```
0.0 0.5 1.0 1.5 2.0
```

Extrapolation function: `quadratic`

Additional information reported by the function are the values of the components of  $\theta$  estimated for each  $\lambda$ .

```
> simex.ris.all$all.theta
      mu.eta      mu.xi sigma2.eta sigma2.xi      rho
0 -1.525346 -4.251527 0.4703852 0.5508821 -0.2702424
```

|     |           |           |           |           |            |
|-----|-----------|-----------|-----------|-----------|------------|
| 0.5 | -1.525485 | -4.244906 | 0.5074810 | 0.6456262 | -0.2286051 |
| 1   | -1.525542 | -4.242164 | 0.5519832 | 0.7538321 | -0.1918922 |
| 1.5 | -1.525586 | -4.240060 | 0.5977038 | 0.8642529 | -0.1613759 |
| 2   | -1.525623 | -4.238286 | 0.6440552 | 0.9758202 | -0.1383087 |

This information can be used for a visual inspection of the SIMEX components and a direct extrapolation of the points of interest, if necessary. For example, the values of  $\bar{\eta}$  obtained in the simulation step for the chosen  $\lambda$  are reported in Figure 1, together with the quadratic extrapolation function. The SIMEX estimate corresponding to  $\lambda = -1$  is reported with a filled circle. The uncorrected estimate corresponds to  $\lambda = 0$ .

```
## How to obtain Figure 1
R> plot( c( -1, simex.ris.all$lambda ),
        c( simex.ris.all$theta[, 'mu.eta'],
          simex.ris.all$all.theta[, 'mu.eta'] ),
        xlab=expression( lambda ), ylab='',
        main=expression( paste( 'Estimate of ', bar( eta ) ) ), las=1 )
## highlight the SIMEX estimate
R> points(-1, simex.ris.all$theta[, 'mu.eta'], pch = 19)
## compute the quadratic extrapolation function
R> m <- lm( simex.ris.all$all.theta[, 'mu.eta'] ~ simex.ris.all$lambda
           + I( simex.ris.all$lambda^2 ) )
## draw the quadratic extrapolation function
R> curve( coef( m )[1] + coef( m )[2]*x + coef( m )[3]*( x^2 ),
         add=TRUE )
```

## Figures

Figure 1: **SIMEX estimate of  $\bar{\eta}$** . Estimate of  $\bar{\eta}$  for different values of  $\lambda$  and quadratic extrapolation function on the basis of the data in the meta-analysis of Van Zaane et al. [1]. The SIMEX estimate corresponds to  $\lambda = -1$ .

## References

- [1] Van Zaane, B., Zuithoff, N.P.A., Reitsma, J.B., Bax, L., Nierich, A.P., Moons, K.G.: Meta-analysis of the diagnostic accuracy of transesophageal echocardiography for assessment of atherosclerosis in the ascending aorta in patients undergoing cardiac surgery. *Acta Anaesthesiologica Scandinavica* **52**, 1179–1187 (2008)
